# Supplementary material for: Effects of Synthesis Conditions on the Formation of Si-Substituted Alpha Tricalcium Phosphates
Source: PubMed Central journal article supplement (PMC7729989; doi:10.3390/ijms21239164), 2020-12-01
Supplement: ijms-21-09164-s001.pdf [file ijms-21-09164-s001.pdf]

Supplementary Materials

## Effects of Synthesis Conditions on the Formation of Si-Substituted Alpha Tricalcium Phosphates

Katarzyna Szurkowska <sup>1</sup>, Łukasz Szeleszczuk <sup>2</sup> and Joanna Kolmas <sup>1,\*</sup>

<sup>1</sup> Chair of Analytical Chemistry and Biomaterials, Department of Analytical Chemistry, Medical University of Warsaw, Faculty of Pharmacy, ul. Banacha 1, 02-097 Warsaw, Poland; katarzyna.szurkowska@wum.edu.pl

<sup>2</sup> Chair of Physical Pharmacy, Department of Physical Chemistry, Medical University of Warsaw, Faculty of Pharmacy, ul. Banacha 1, 02-097 Warsaw, Poland; lukasz.szeleszczuk@wum.edu.pl

\* Correspondence: joanna.kolmas@wum.edu.pl; Tel.: +48 22 5720755

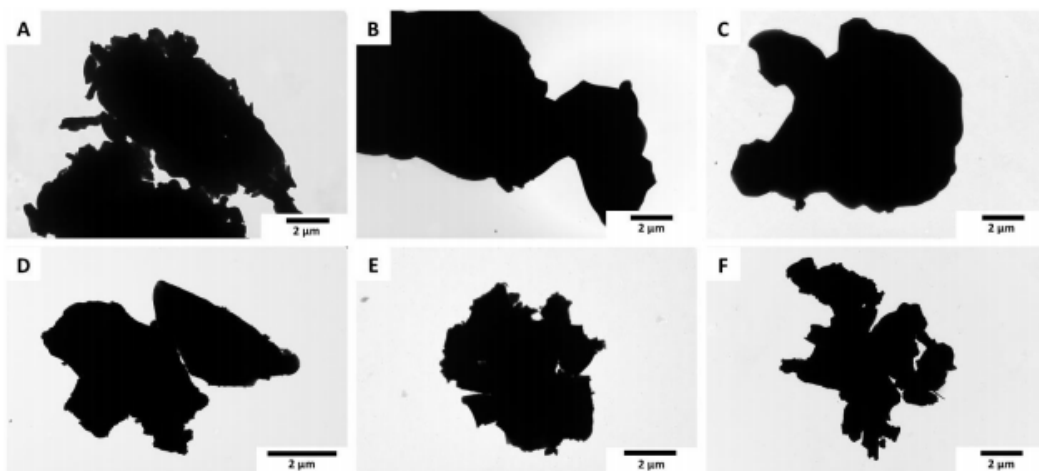

**Figure S1.** TEM images of 09Si-aTCP (A), 18Si-aTCP (B), 37-aTCP (C), 09Si-aTCPs (D), 18Si-aTCPs (E) and 37Si-aTCPs (F).

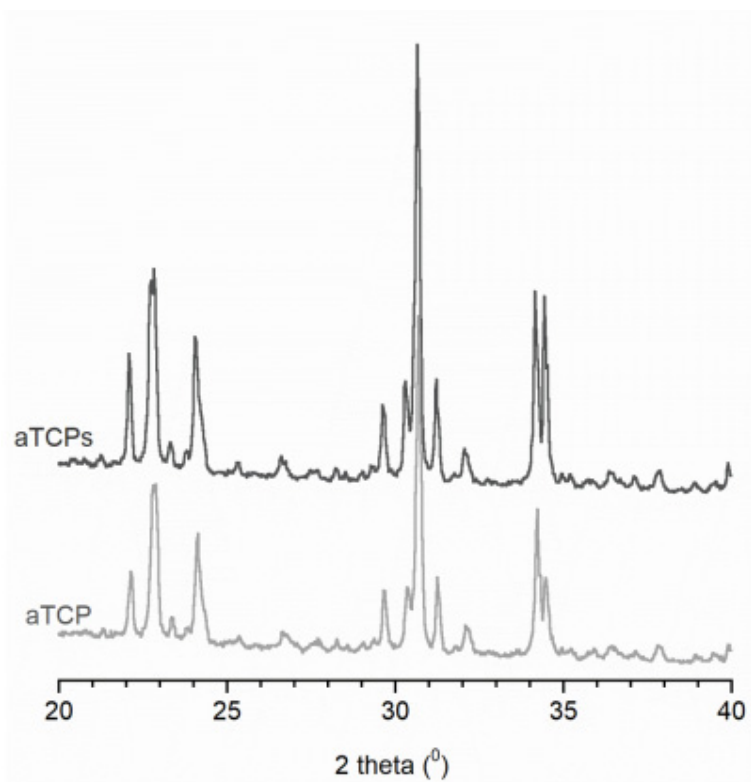

**Figure S2.** PXRD diffractograms of the aTCP and aTCPs samples.

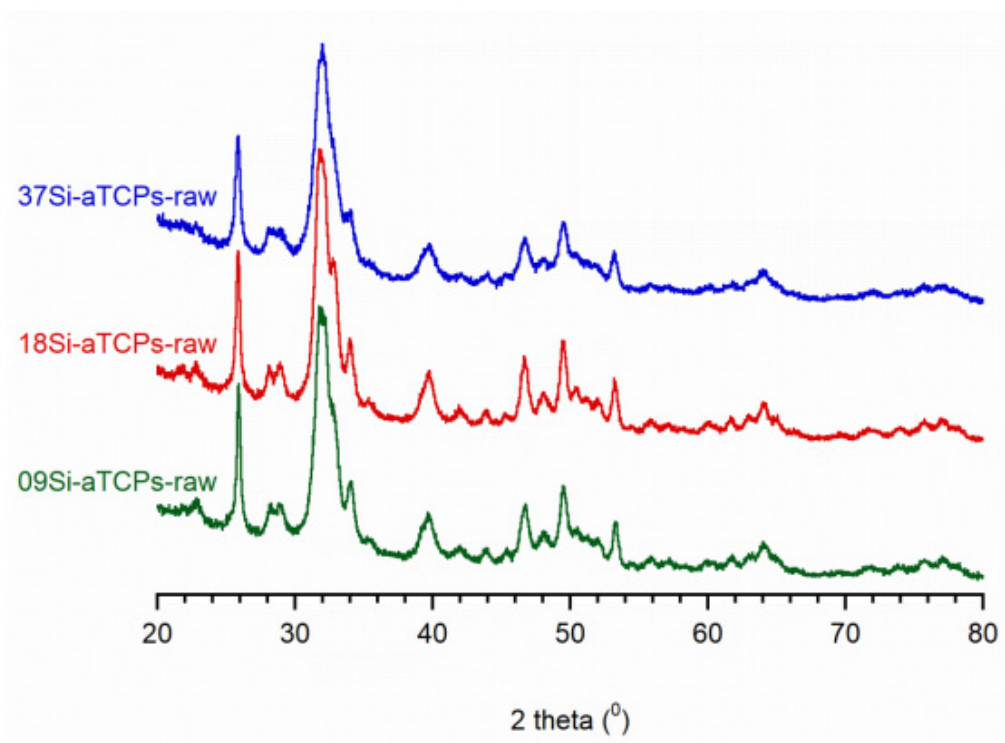

Figure S3: PXRD diffractograms of the raw, unsintered samples obtained by precipitation method.

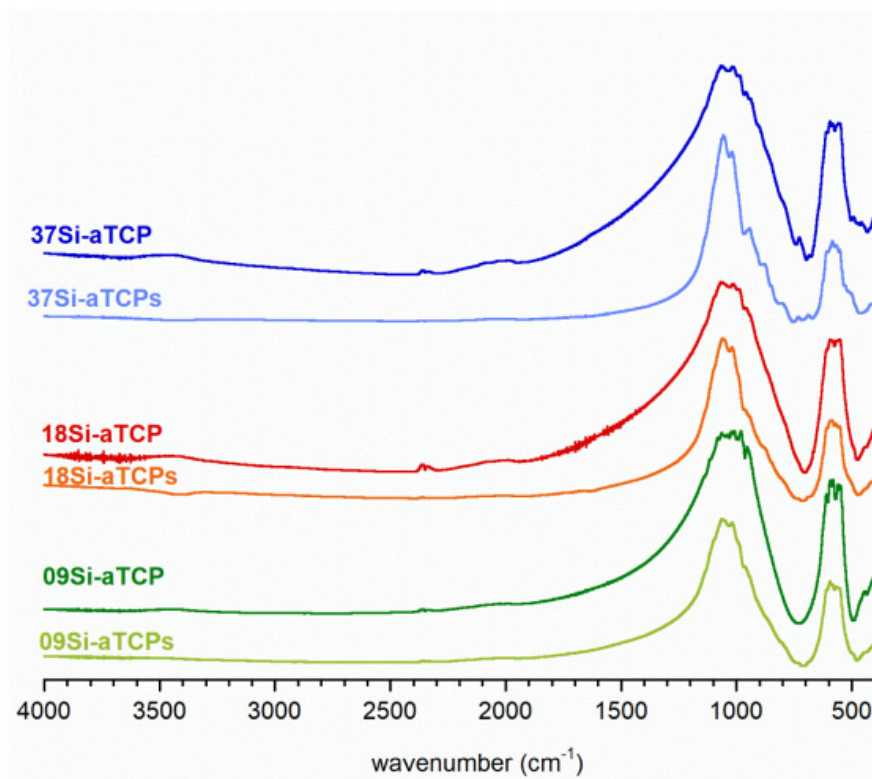

Figure S4. FTIR spectra in 4000-400 cm<sup>-1</sup> range.

**Table S1:** Main peak positions in PXRD diffractograms.

| Peak Index  | Peak position – 2 theta (°) |           |         |            |            |            |
|-------------|-----------------------------|-----------|---------|------------|------------|------------|
|             | 09Si-aTCP                   | 18Si-aTCP | 37-aTCP | 09Si-aTCPs | 18Si-aTCPs | 37Si-aTCPs |
| <b>201</b>  | 22.20                       | 22.24     | 22.33   | 22.28      | 22.45      | 22.42      |
| <b>16-2</b> | 22.84                       | 22.75     | 22.84   | 22.80      | 22.96      | 22.92      |
| <b>33-2</b> | 22.92                       | 22.96     | 23.00   | 23.00      | 23.18      | 23.14      |
| <b>161</b>  | 24.20                       | 24.15     | 24.20   | 24.20      | 24.36      | 24.28      |
| <b>36-1</b> | 29.74                       | 29.74     | 29.83   | 29.74      | 29.92      | 29.87      |
| <b>40-1</b> | 30.42                       | 30.34     | 30.38   | 30.34      | 30.50      | 30.46      |
| <b>034</b>  | 30.76                       | 30.80     | 30.85   | 30.80      | 30.97      | 30.93      |
| <b>33-5</b> | 31.31                       | 31.31     | 31.36   | 31.31      | 31.48      | 31.44      |
| <b>290</b>  | 34.28                       | 34.24     | 34.28   | 34.24      | 34.40      | 34.36      |
| <b>400</b>  | 34.53                       | 34.66     | 34.75   | 34.66      | 34.87      | 34.78      |

**Table S2.** PXRD Data.

| Sample                | Spacegroup | Parameter <i>a</i> | Parameter <i>b</i> | Parameter <i>c</i> | $\beta$ |
|-----------------------|------------|--------------------|--------------------|--------------------|---------|
| <b>aTCP</b>           | P21/a      | 12.8752            | 27.2760            | 15.2140            | 126.190 |
| <b>aTCPs</b>          | P21/a      | 12.8828            | 27.2740            | 15.2191            | 126.179 |
| <b>09Si-aTCPs_raw</b> | P63/m      | 9.4310             |                    | 6.8708             |         |
| <b>18Si-aTCPs_raw</b> | P63/m      | 9.4247             |                    | 6.8756             |         |
| <b>37Si-aTCPs_raw</b> | P63/m      | 9.4257             |                    | 6.8760             |         |
